# Supplementary material for: Investigating the hepatoprotective potentiality of marine-derived steroids as promising inhibitors of liver fibrosis
Source: Royal Society of Chemistry journal article supplement (doi:10.1039/d3ra04843h), 2023-01-01
Supplement: d3ra04843h1.xlsx [file d3ra04843h1.xlsx]

## Sheet: swissadme 1-26
Molecule	Canonical SMILES	Formula	MW	#Heavy atoms	#Aromatic heavy atoms	Fraction Csp3	#Rotatable bonds	#H-bond acceptors	#H-bond donors	MR	TPSA	iLOGP	XLOGP3	WLOGP	MLOGP	Silicos-IT Log P	Consensus Log P	ESOL Log S	ESOL Solubility (mg/ml)	ESOL Solubility (mol/l)	ESOL Class	Ali Log S	Ali Solubility (mg/ml)	Ali Solubility (mol/l)	Ali Class	Silicos-IT LogSw	Silicos-IT Solubility (mg/ml)	Silicos-IT Solubility (mol/l)	Silicos-IT class	GI absorption	BBB permeant	Pgp substrate	CYP1A2 inhibitor	CYP2C19 inhibitor	CYP2C9 inhibitor	CYP2D6 inhibitor	CYP3A4 inhibitor	log Kp (cm/s)	Lipinski #violations	Ghose #violations	Veber #violations	Egan #violations	Muegge #violations	Bioavailability Score	PAINS #alerts	Brenk #alerts	Leadlikeness #violations	Synthetic Accessibility
Molecule 1	O[C@H]1CC[C@]2(C(=CC[C@@H]3[C@@H]2CC[C@]2([C@H]3CCC2[C@@H](CC[C@@H](C(C)C)C)C)C)C1)C	C28H48O	400.68	29	0	0.93	5	1	1	128.42	20.23	4.83	8.8	7.63	6.54	6.63	6.89	-7.54	1.16e-05	2.9e-08	Poorly soluble	-9.11	3.13e-07	7.8e-10	Poorly soluble	-5.79	0.000642	1.6e-06	Moderately soluble	Low	No	No	No	No	No	No	No	-2.5	1	2	0	1	2	0.55	0	1	2	6.17
Molecule 2	O[C@H]1CC[C@]2(C(=CC[C@@H]3[C@@H]2CC[C@]2([C@H]3CCC2[C@@H]([C@H]2C[C@]2(C)[C@@H](C(=C)C)C)C)C)C1)C	C30H48O	424.7	31	0	0.87	4	1	1	135.19	20.23	4.9	8.87	7.8	6.82	6.93	7.07	-7.8	6.77e-06	1.59e-08	Poorly soluble	-9.18	2.8e-07	6.6e-10	Poorly soluble	-5.95	0.000477	1.12e-06	Moderately soluble	Low	No	No	No	No	Yes	No	No	-2.59	1	3	0	1	2	0.55	0	1	2	6.39
Molecule 3	O[C@H]1CC[C@]2(C(=CC[C@@H]3[C@@H]2CC[C@]2([C@H]3CC[C@@H]2[C@@H](C2C[C@]2(C)[C@H](C(C)C)C)C)C)C1)C	C30H50O	426.72	31	0	0.93	4	1	1	135.66	20.23	4.97	8.94	7.88	6.92	6.92	7.13	-7.85	5.97e-06	1.4e-08	Poorly soluble	-9.25	2.38e-07	5.58e-10	Poorly soluble	-5.94	0.000493	1.16e-06	Moderately soluble	Low	No	No	No	No	No	No	No	-2.56	1	3	0	1	2	0.55	0	1	2	6.47
Molecule 4	O[C@H]1CC[C@]2(C(=CC[C@@H]3[C@@H]2CC[C@]2([C@H]3CCC2[C@@H](CC[C@H](C(C)C)C)C)C)C1)C	C28H48O	400.68	29	0	0.93	5	1	1	128.42	20.23	4.97	8.8	7.63	6.54	6.63	6.92	-7.54	1.16e-05	2.9e-08	Poorly soluble	-9.11	3.13e-07	7.8e-10	Poorly soluble	-5.79	0.000642	1.6e-06	Moderately soluble	Low	No	No	No	No	No	No	No	-2.5	1	2	0	1	2	0.55	0	1	2	6.17
Molecule 5	O[C@H]1CC[C@]2(C(=CC[C@@H]3[C@@H]2CC[C@]2([C@H]3CCC2[C@@H](CCC(=C)C(C)C)C)C)C1)C	C28H46O	398.66	29	0	0.86	5	1	1	127.95	20.23	4.83	8.62	7.55	6.43	6.64	6.81	-7.41	1.54e-05	3.87e-08	Poorly soluble	-8.92	4.78e-07	1.2e-09	Poorly soluble	-5.81	0.000622	1.56e-06	Moderately soluble	Low	No	No	No	No	Yes	No	No	-2.61	1	2	0	1	2	0.55	0	1	2	6.02
Molecule 6	O[C@H]1C[C@H](O)[C@]2(C(=CC[C@@H]3[C@@H]2CC[C@]2([C@H]3CCC2[C@@H](CC[C@@H](C(C)C)C)C)C)C1)C	C28H48O2	416.68	30	0	0.93	5	2	2	129.58	40.46	4.71	7.82	6.61	5.61	5.74	6.1	-7.02	3.98e-05	9.55e-08	Poorly soluble	-8.52	1.27e-06	3.05e-09	Poorly soluble	-4.98	0.0044	1.06e-05	Moderately soluble	High	No	No	No	No	No	No	No	-3.29	1	2	0	1	1	0.55	0	1	2	6.41
Molecule 7	O[C@H]1CC[C@]2(C(=CC[C@@H]3[C@@H]2CC[C@]2([C@H]3CCC2[C@@H](CC[C@@H](C(O)(C)C)C)C)C)C1)C	C28H48O2	416.68	30	0	0.93	5	2	2	129.62	40.46	4.7	7.21	6.75	5.61	5.87	6.03	-6.64	9.64e-05	2.31e-07	Poorly soluble	-7.88	5.46e-06	1.31e-08	Poorly soluble	-5.21	0.00259	6.22e-06	Moderately soluble	High	No	No	No	No	No	No	No	-3.72	1	2	0	1	1	0.55	0	1	2	6.21
Molecule 8	OCC([C@H](CC[C@H](C1CC[C@@H]2[C@]1(C)CC[C@H]1[C@H]2CC=C2[C@]1(C)CC[C@@H](C2)O)C)C)(O)C	C28H48O3	432.68	31	0	0.93	6	3	3	130.78	60.69	4.48	6.16	5.72	4.73	5.27	5.27	-6.01	0.000425	9.83e-07	Poorly soluble	-7.22	2.62e-05	6.05e-08	Poorly soluble	-4.63	0.01	2.32e-05	Moderately soluble	High	No	No	No	No	No	No	No	-4.57	1	3	0	0	1	0.55	0	1	2	6.35
Molecule 9	O[C@H]1C[C@H](O)[C@]2(C(=CC[C@@H]3C2[C@H](O)C[C@]2([C@H]3CCC2[C@@H](CCC(C(C)C)C)C)C)C1)C	C28H48O3	432.68	31	0	0.93	5	3	3	130.75	60.69	4.3	6.48	5.58	4.73	4.86	5.19	-6.28	0.00023	5.31e-07	Poorly soluble	-7.55	1.22e-05	2.82e-08	Poorly soluble	-4.16	0.0303	7e-05	Moderately soluble	High	No	No	No	No	No	No	No	-4.34	1	2	0	0	1	0.55	0	1	2	6.62
Molecule 10	CC([C@H](/C(=C/[C@H](C1CC[C@@H]2[C@]1(C)CC[C@H]1[C@H]2CC[C@@H]2[C@]1(C)CC[C@@H]([C@H]2C)O)C)/C)C)C	C30H52O	428.73	31	0	0.93	4	1	1	138.04	20.23	5.23	9.9	8.13	6.92	6.85	7.41	-8.47	1.45e-06	3.38e-09	Poorly soluble	-10.25	2.42e-08	5.63e-11	Insoluble	-5.61	0.00105	2.44e-06	Moderately soluble	Low	No	No	No	No	No	No	No	-1.89	1	3	0	1	2	0.55	0	1	2	6.09
Molecule 11	O[C@H]1CC[C@]2(C(=CC[C@@H]3[C@]2(O)CC[C@]2([C@H]3CCC2[C@@H]([C@H]2C[C@]2(C)[C@@H](C(C)C)C)C)C)C1)C	C30H50O2	442.72	32	0	0.93	4	2	2	136.86	40.46	4.84	7.51	7	6	6.43	6.35	-7.05	3.93e-05	8.87e-08	Poorly soluble	-8.19	2.83e-06	6.4e-09	Poorly soluble	-5.57	0.0012	2.72e-06	Moderately soluble	Low	No	No	No	No	No	No	No	-3.67	1	3	0	1	1	0.55	0	1	2	6.63
Molecule 12	O[C@H]1CC[C@]2(C(=CC[C@@H]3C2[C@H](O)C[C@]2([C@H]3CC[C@@H]2[C@@H]([C@H]2C[C@]2(C)[C@@H](C(C)C)C)C)C)C1)C	C30H50O2	442.72	32	0	0.93	4	2	2	136.82	40.46	4.8	7.59	6.85	6	6.03	6.25	-7.1	3.5e-05	7.9e-08	Poorly soluble	-8.28	2.34e-06	5.28e-09	Poorly soluble	-5.12	0.00338	7.64e-06	Moderately soluble	Low	No	No	No	No	No	No	No	-3.61	1	3	0	1	1	0.55	0	1	2	6.61
Molecule 13	O[C@H]1CC[C@]2(C(=C[C@@H](C3[C@@H]2CC[C@]2([C@H]3CCC2[C@@H](C2C[C@]2(C)[C@@H](C(C)C)C)C)C)O)C1)C	C30H50O2	442.72	32	0	0.93	4	2	2	136.82	40.46	4.8	7.83	6.85	6	6.03	6.3	-7.25	2.47e-05	5.58e-08	Poorly soluble	-8.53	1.32e-06	2.98e-09	Poorly soluble	-5.12	0.00338	7.64e-06	Moderately soluble	Low	No	No	No	No	No	No	No	-3.44	1	3	0	1	1	0.55	0	1	2	6.58
Molecule 14	O[C@H]1CC[C@]2(C(=C[C@@H]([C@@H]3C2[C@H](O)C[C@]2([C@H]3CC[C@@H]2[C@@H]([C@H]2C[C@]2(C)[C@@H](C(C)C)C)C)C)O)C1)C	C30H50O3	458.72	33	0	0.93	4	3	3	137.99	60.69	4.29	6.48	5.82	5.12	5.14	5.37	-6.5	0.000144	3.14e-07	Poorly soluble	-7.55	1.29e-05	2.82e-08	Poorly soluble	-4.29	0.0233	5.07e-05	Moderately soluble	High	No	Yes	No	No	No	No	No	-4.5	1	3	0	0	1	0.55	0	1	2	6.78
Molecule 15	O[C@H]1C[C@H](O)[C@]2(C(=CC[C@@H]3C2[C@H](O)C[C@]2([C@H]3CCC2[C@@H](C2C[C@]2(C)[C@@H](C(C)C)C)C)C)C1)C	C30H50O3	458.72	33	0	0.93	4	3	3	137.99	60.69	4.33	6.62	5.82	5.12	5.14	5.41	-6.59	0.000118	2.57e-07	Poorly soluble	-7.7	9.25e-06	2.02e-08	Poorly soluble	-4.29	0.0233	5.07e-05	Moderately soluble	High	No	Yes	No	No	No	No	No	-4.4	1	3	0	0	1	0.55	0	1	2	6.89
Molecule 16	O[C@H]1CC[C@]2(C(=C[C@@H]([C@@H]3C2[C@H](O)[C@H](O)[C@]2([C@H]3CC[C@@H]2[C@@H]([C@H]2C[C@]2(C)[C@@H](C(C)C)C)C)C)O)C1)C	C30H50O4	474.72	34	0	0.93	4	4	4	139.15	80.92	4.29	5.51	4.79	4.27	4.25	4.62	-5.99	0.000485	1.02e-06	Moderately soluble	-6.97	5.11e-05	1.08e-07	Poorly soluble	-3.47	0.16	0.000337	Soluble	High	No	Yes	No	No	No	No	No	-5.28	1	2	0	0	1	0.55	0	1	2	6.95
Molecule 17	O[C@H]1CC[C@]2(C(=C[C@@H]([C@@H]3[C@]2(O)[C@H](O)C[C@]2([C@H]3CC[C@@H]2[C@@H]([C@H]2C[C@]2(C)[C@@H](C(C)C)C)C)C)O)C1)C	C30H50O4	474.72	34	0	0.93	4	4	4	139.19	80.92	4.21	5.42	4.94	4.27	4.65	4.7	-5.93	0.000553	1.16e-06	Moderately soluble	-6.87	6.33e-05	1.33e-07	Poorly soluble	-3.92	0.0567	0.000119	Soluble	High	No	Yes	No	No	No	No	No	-5.35	1	2	0	0	1	0.55	0	1	2	6.95
Molecule 18	O[C@H]1CC[C@]2(C(=CC[C@@H]3[C@]2(O)[C@H](O)C[C@]2([C@@]3(O)CC[C@@H]2[C@@H]([C@H]2C[C@]2(C)[C@@H](C(C)C)C)C)C)C1)C	C30H50O4	474.72	34	0	0.93	4	4	4	139.22	80.92	4.46	5.11	5.08	4.27	5.04	4.79	-5.74	0.000867	1.83e-06	Moderately soluble	-6.55	0.000133	2.8e-07	Poorly soluble	-4.37	0.0202	4.25e-05	Moderately soluble	High	No	Yes	No	No	No	No	No	-5.57	1	2	0	0	1	0.55	0	1	2	6.91
Molecule 19	O[C@H]1C[C@@H](O)[C@]2([C@@](C1)(O)[C@H](O)C[C@@H]1[C@@H]2CC[C@]2([C@H]1CC[C@@H]2[C@@H]([C@H]1C[C@]1(C)[C@@H](C(C)C)C)C)C)C	C30H52O4	476.73	34	0	1	4	4	4	139.66	80.92	4.15	6.38	5.02	4.41	4.66	4.92	-6.55	0.000134	2.81e-07	Poorly soluble	-7.87	6.42e-06	1.35e-08	Poorly soluble	-3.94	0.0549	0.000115	Soluble	High	No	Yes	No	No	No	No	No	-4.68	1	2	0	0	1	0.55	0	0	2	6.53
Molecule 20	O[C@H]1CC[C@]2([C@@](C1)(O)[C@H](O)C[C@@H]1[C@@H]2[C@H](O)[C@H](O)[C@]2([C@H]1CC[C@@H]2[C@@H]([C@H]1C[C@]1(C)[C@@H](C(C)C)C)C)C)C	C30H52O5	492.73	35	0	1	4	5	5	140.82	101.15	4.12	5.04	3.99	3.58	3.77	4.1	-5.81	0.00077	1.56e-06	Moderately soluble	-6.91	6.13e-05	1.24e-07	Poorly soluble	-3.12	0.377	0.000766	Soluble	High	No	Yes	No	No	No	No	No	-5.73	0	3	0	0	1	0.55	0	0	2	6.61
Molecule 21	O[C@H]1CC[C@]2([C@@](C1)(O)[C@H](O)C[C@@H]1[C@@H]2[C@H](O)[C@H](O)[C@]2([C@H]1CC[C@@H]2[C@@H]([C@H]1C[C@]1(C)[C@@H](C(C)C)C)C)C)C	C30H52O5	492.73	35	0	1	4	5	5	140.82	101.15	4.12	5.04	3.99	3.58	3.77	4.1	-5.81	0.00077	1.56e-06	Moderately soluble	-6.91	6.13e-05	1.24e-07	Poorly soluble	-3.12	0.377	0.000766	Soluble	High	No	Yes	No	No	No	No	No	-5.73	0	3	0	0	1	0.55	0	0	2	6.61
Molecule 22	O[C@H]1C[C@H](O)[C@]2(C(=CC[C@@H]3C2[C@H](O)C[C@]2([C@H]3CCC2[C@@H](C2CC2[C@@H](C(C)C)C)C)C)C1)C	C29H48O3	444.69	32	0	0.93	4	3	3	133.44	60.69	4.7	6.22	5.43	4.92	4.62	5.18	-6.25	0.000249	5.6e-07	Poorly soluble	-7.28	2.33e-05	5.25e-08	Poorly soluble	-3.7	0.0881	0.000198	Soluble	High	No	Yes	No	No	No	No	No	-4.6	1	2	0	0	1	0.55	0	1	2	6.77
Molecule 23	CC([C@H]([C@@]1(C)CC1[C@H](C1CC[C@@H]2[C@]1(C)CC[C@H]1[C@H]2C[C@H](C2=C[C@H](CC[C@]12C)O)O)C)C)C	C30H50O2	442.72	32	0	0.93	4	2	2	136.82	40.46	4.72	7.69	6.85	6	6.03	6.26	-7.17	3.02e-05	6.83e-08	Poorly soluble	-8.38	1.84e-06	4.16e-09	Poorly soluble	-5.12	0.00338	7.64e-06	Moderately soluble	Low	No	No	No	No	No	No	No	-3.54	1	3	0	1	1	0.55	0	1	2	6.61
Molecule 24	O[C@H]1CC[C@]2(C(=CC[C@@H]3[C@@H]2CC[C@]2([C@H]3CCC2[C@@H](/C=C/C2CC2C)C)C)C1)C	C27H42O	382.62	28	0	0.85	3	1	1	121.03	20.23	4.7	7.26	6.77	6.23	5.77	6.15	-6.59	9.88e-05	2.58e-07	Poorly soluble	-7.51	1.18e-05	3.09e-08	Poorly soluble	-4.59	0.00988	2.58e-05	Moderately soluble	Low	No	No	No	No	Yes	No	No	-3.48	1	1	0	1	2	0.55	0	1	2	5.97
Molecule 25	O[C@H]1CC[C@]2(C(=CC[C@@H]3[C@@H]2CC[C@]2([C@H]3CCC2[C@@H](/C=C/[C@@H](C(=C)C)C)C)C)C1)C	C28H44O	396.65	29	0	0.79	4	1	1	127.47	20.23	4.85	8.12	7.33	6.33	6.46	6.62	-7.15	2.8e-05	7.07e-08	Poorly soluble	-8.4	1.57e-06	3.96e-09	Poorly soluble	-5.09	0.00322	8.13e-06	Moderately soluble	Low	No	No	No	No	Yes	No	No	-2.95	1	2	0	1	2	0.55	0	1	2	6.1
Molecule 26	O[C@H]1CC[C@]2(C(=CC[C@@H]3[C@@H]2CC[C@]2([C@H]3CCC2[C@@H](CC[C@@H](C(=C)C)C)C)C)C1)C	C28H46O	398.66	29	0	0.86	5	1	1	127.95	20.23	4.77	8.73	7.55	6.43	6.64	6.82	-7.48	1.32e-05	3.3e-08	Poorly soluble	-9.04	3.68e-07	9.22e-10	Poorly soluble	-5.81	0.000622	1.56e-06	Moderately soluble	Low	No	No	No	No	Yes	No	No	-2.53	1	2	0	1	2	0.55	0	1	2	6.09
Silymarin	COC1=C(C=CC(=C1)C2C(OC3=C(O2)C=C(C=C3)C4C(C(=O)C5=C(C=C(C=C5O4)O)O)O)CO)O	C25H22O10	482.44	35	18	0.24	4	10	5	120.55	155.14	2.79	1.90	1.71	-0.40	1.92	1.59	-4.14	3.46e-02	7.17e-05	Moderately soluble	-4.78	7.99e-03	1.66e-05	Moderately soluble	-4.50	1.53e-02	3.16e-05	Moderately soluble	Low	No	No	No	No	No	No	Yes	-7.89	0	1	1	1	1	0.55	0	0	1	4.92
