# Supplementary material for: Investigating the hepatoprotective potentiality of marine-derived steroids as promising inhibitors of liver fibrosis
Source: Royal Society of Chemistry journal article supplement (doi:10.1039/d3ra04843h), 2023-01-01
Supplement: d3ra04843h2.pdf [file d3ra04843h2.pdf]

# Investigating the Hepatoprotective Potentiality of Marine-Derived Steroids as Promising Inhibitors of Liver Fibrosis

Mohamed A. Tammam <sup>a+</sup>, Florbela Pereira<sup>b+</sup>, Omnia Aly <sup>c+</sup>, Mohamed Sebak <sup>d</sup>, Yasser M. Diab

<sup>a</sup>, Aldoushy Mahdy <sup>e</sup> and Amr El-Demerdash <sup>f, g\*</sup>

<sup>a</sup> Department of Biochemistry, Faculty of Agriculture, Fayoum University, Fayoum 63514, Egypt

<sup>b</sup> LAQV REQUIMTE, Department of Chemistry, NOVA School of Science and Technology, Universidade Nova de Lisboa, 2829516 Caparica, Portugal

<sup>c</sup> Department of Medical Biochemistry, National Research Centre, Cairo 12622, Egypt

<sup>d</sup> Microbiology and Immunology Department, Faculty of Pharmacy, Beni-Suef University

<sup>e</sup> Department of Zoology, Faculty of Science, Al-Azhar University (Assiut Branch), Assiut 71524, Egypt

<sup>f</sup> Division of Organic Chemistry, Department of Chemistry, Faculty of Sciences, Mansoura University, Mansoura 35516, Egypt

<sup>g</sup> Department of Biochemistry and Metabolism, the John Innes Centre, Norwich Research Park, Norwich NR4 7UH, UK

<sup>+</sup> These authors are equally contributed,

**\*Corresponding author:** Amr El-Demerdash (A.E-D), [a\\_eldemerdash83@mans.edu.eg](mailto:a_eldemerdash83@mans.edu.eg); [Amr.El-Demerdash@jic.ac.uk](mailto:Amr.El-Demerdash@jic.ac.uk)

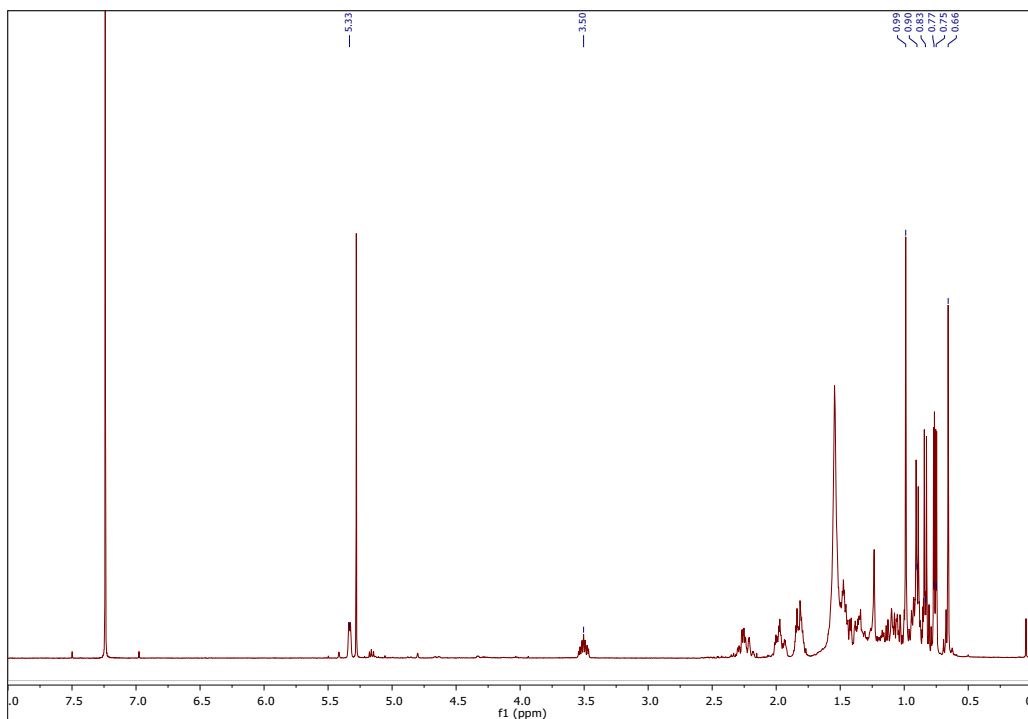

**Fig. S1**  $^1\text{H}$  NMR spectrum of 24*S*-methyl-cholest-5-en-3 $\beta$ -ol (**1**) in  $\text{CDCl}_3$ .

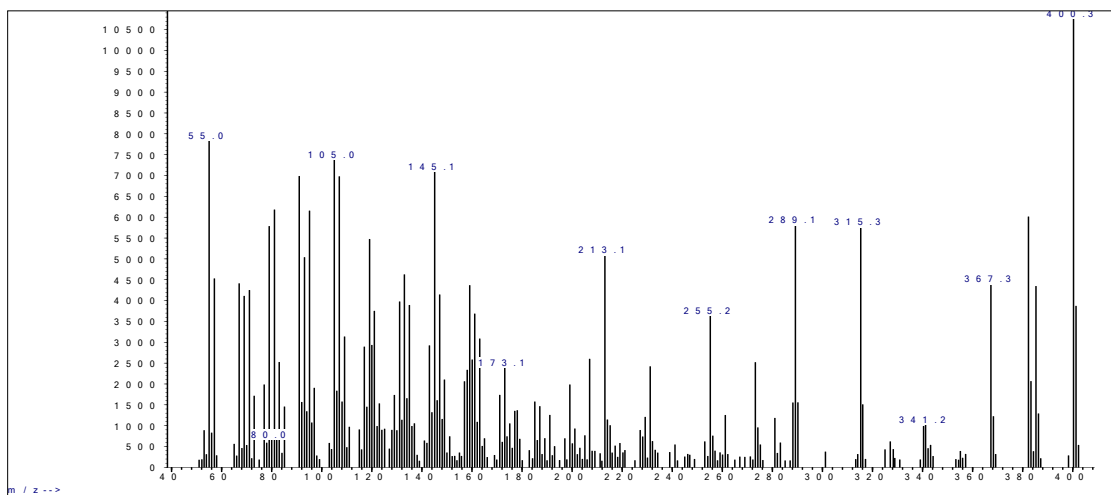

**Fig. S2** ESIMS spectrum of 24*S*-methyl-cholest-5-en-3 $\beta$ -ol (**1**).

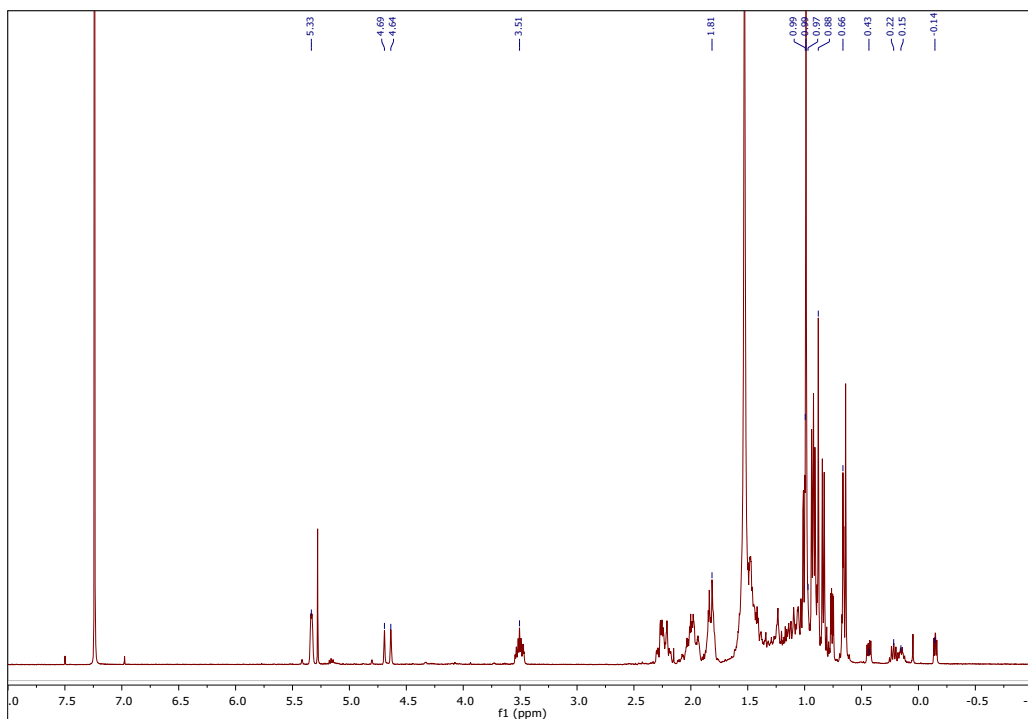

**Fig. S3**  $^1\text{H}$  NMR spectrum of gorgostan-5,25-dien- $3\beta$ -ol (**2**) in  $\text{CDCl}_3$ .

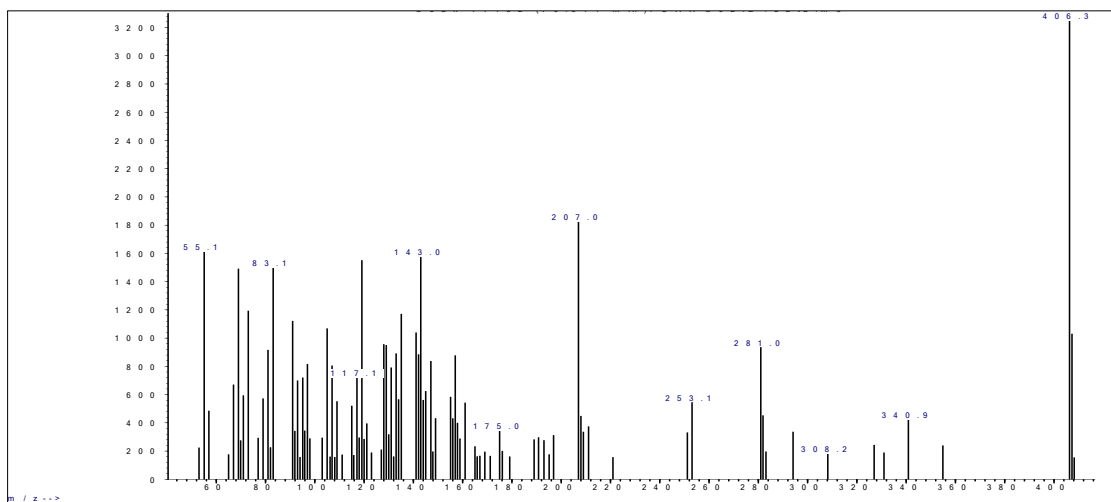

**Fig. S4** ESIMS spectrum of gorgostan-5,25-dien- $3\beta$ -ol (**2**).

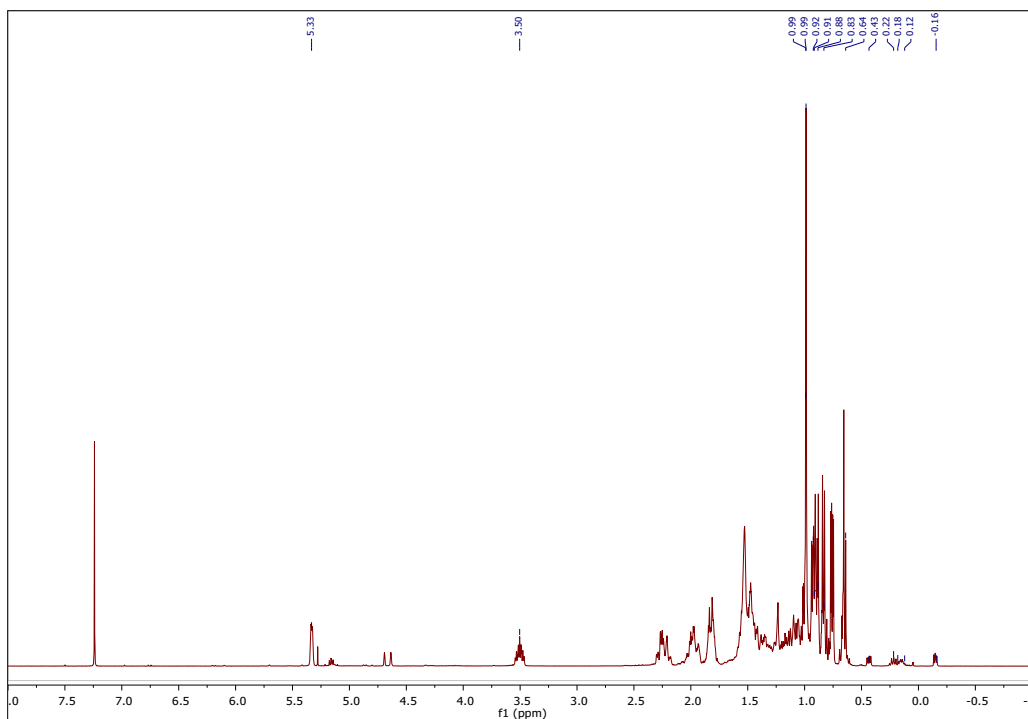

**Fig. S5**  $^1\text{H}$  NMR spectrum of gorgosterol (**3**) in  $\text{CDCl}_3$ .

**Figure S6.** ESIMS spectrum of gorgosterol (**3**).

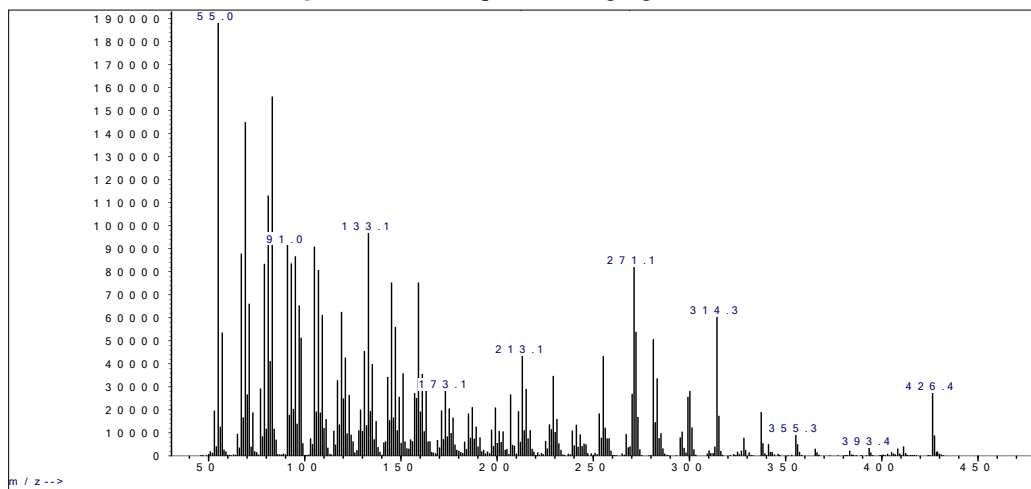

**Fig. S6** ESIMS spectrum of gorgosterol (**3**).

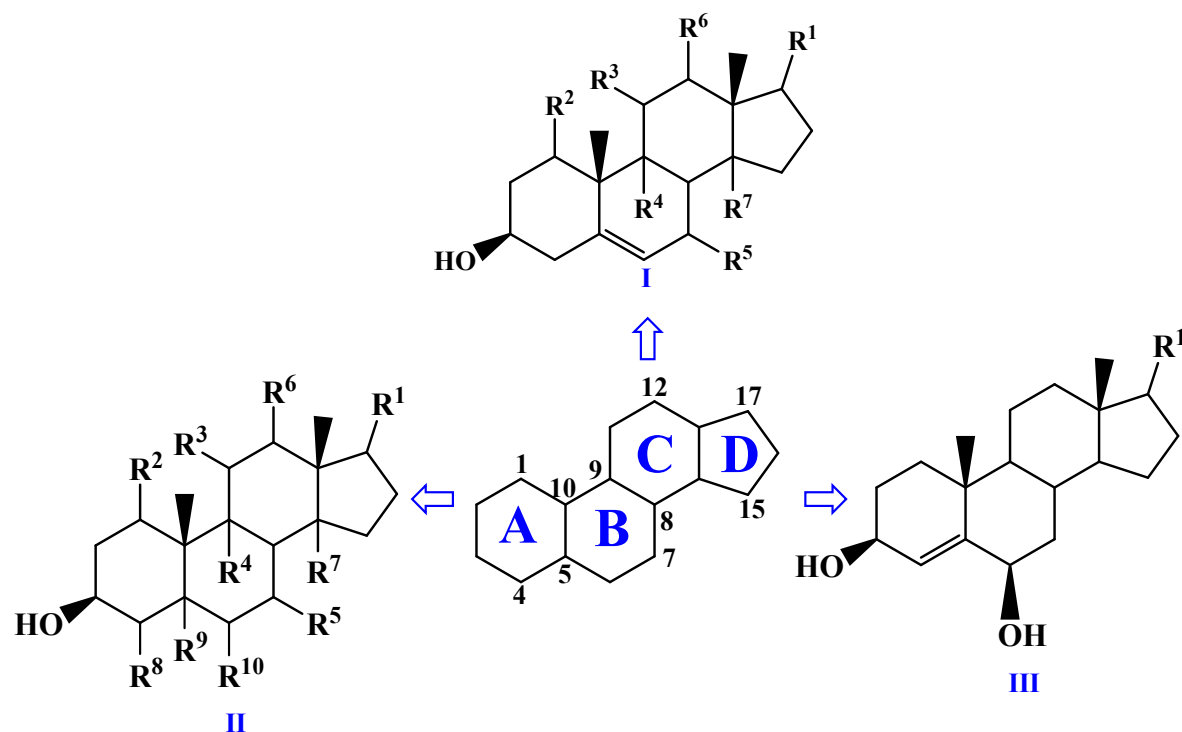

All the steroids isolated possess a fused tetracyclic ring system with three six-membered rings and a five-membered ring as a common scaffold from core I, II or III, **Scheme S1**. The six-membered rings of the carbon skeleton are designated as A, B, C, and the five-membered as D. They all have two methyl groups and an eight- to eleven-carbon side chain at C-10, C-13 and C-17, respectively. The fused tetracyclic ring system and the side chain at C-17 are densely decorated by hydroxyl and methyl groups. The 4,5-bond on ring A and 5,6-bond on ring D can be either saturated or unsaturated.

**Scheme S1. Reported steroid derivatives (1-26)**

| #  | Core | Source, <sup>Ref</sup>                                                 | Name                                                                      | R <sup>1</sup> | R <sup>2</sup> | R <sup>3</sup> | R <sup>4</sup> | R <sup>5</sup> | R <sup>6</sup> | R <sup>7</sup> | R <sup>8</sup>  | R <sup>9</sup> | R <sup>10</sup> |
|----|------|------------------------------------------------------------------------|---------------------------------------------------------------------------|----------------|----------------|----------------|----------------|----------------|----------------|----------------|-----------------|----------------|-----------------|
| 1  | I    | soft coral <sup>a</sup><br><i>Lobophytum crissum</i> , <sup>1</sup>    | 24S-methyl-cholest-5-en-3 $\beta$ -ol                                     |                | H              | H              | H              | H              | H              | H              | --              | --             | --              |
| 2  | I    | soft coral <sup>a</sup><br><i>Lobophytum lobophytum</i> , <sup>2</sup> | gorgostan-5,25-dien-3 $\beta$ -ol                                         |                | H              | H              | H              | H              | H              | H              | --              | --             | --              |
| 3  | I    | soft coral <sup>a</sup> , <i>Lobophytum crissum</i> , <sup>1</sup>     | gorgosterol                                                               |                | H              | H              | H              | H              | H              | H              | --              | --             | --              |
| 4  | I    | <i>Euphorbia pulcherimma</i> , <sup>3</sup>                            | 24R-methyl-cholest-5-en-3 $\beta$ -ol                                     |                | H              | H              | H              | H              | H              | H              | --              | --             | --              |
| 5  | I    | <i>Sinularia polydactyla</i> <sup>4</sup>                              | 24-methyl-cholest-5,24-dien-3 $\beta$ -ol                                 |                | H              | H              | H              | H              | H              | H              | --              | --             | --              |
| 6  | I    | <i>Sinularia</i> sp., <sup>5</sup>                                     | 24S-methyl-cholest-5-en-1 $\alpha$ ,3 $\beta$ -diol                       |                | $\alpha$ -OH   | H              | H              | H              | H              | H              | --              | --             | --              |
| 7  | I    | <i>Sarcophyton glaucum</i> <sup>6</sup>                                | 24S-methyl-cholest-5-en-3 $\beta$ ,25-diol                                |                | H              | H              | H              | H              | H              | H              | --              | --             | --              |
| 8  | I    | <i>Sarcophyton glaucum</i> <sup>6</sup>                                | 24S-methyl-cholest-5-en-3 $\beta$ ,25 $\zeta$ ,26-triol                   |                | H              | H              | H              | H              | H              | H              | --              | --             | --              |
| #  | Core | Source                                                                 | Name                                                                      | R <sup>1</sup> | R <sup>2</sup> | R <sup>3</sup> | R <sup>4</sup> | R <sup>5</sup> | R <sup>6</sup> | R <sup>7</sup> | R <sup>8</sup>  | R <sup>9</sup> | R <sup>10</sup> |
| 9  | I    | <i>Sinularia dissecta</i> , <sup>7</sup>                               | 24 $\zeta$ -Methyl-cholest-5-en-1 $\alpha$ ,3 $\beta$ ,11 $\alpha$ -triol |                | $\alpha$ -OH   | $\alpha$ -OH   | H              | H              | H              | H              | --              | --             | --              |
| 10 | II   | <i>Sarcophyton glaucum</i> , <sup>8</sup>                              | dinosterol                                                                |                | H              | H              | H              | H              | H              | H              | CH <sub>3</sub> | H              | H               |
| 11 | I    | <i>Plexaurella grisea</i> , <sup>9</sup>                               | 9 $\alpha$ -hydroxygorgosterol                                            |                | H              | H              | $\alpha$ -OH   | H              | H              | H              | --              | --             | --              |
| 12 | I    | <i>Plexaurella grisea</i> <sup>9</sup>                                 | 11 $\alpha$ -hydroxygorgosterol                                           |                | H              | $\alpha$ -OH   | H              | H              | H              | H              | --              | --             | --              |
| 13 | I    | <i>Sinularia numerosa</i> , <sup>10</sup>                              | 7 $\beta$ -hydroxygorgosterol                                             |                | H              | H              | H              | $\alpha$ -OH   | H              | H              | --              | --             | --              |

|    |      |                                               |                                                                 |                                                                                      |                |                |                |                |                |                |                |                |                 |
|----|------|-----------------------------------------------|-----------------------------------------------------------------|--------------------------------------------------------------------------------------|----------------|----------------|----------------|----------------|----------------|----------------|----------------|----------------|-----------------|
| 14 | I    | <i>Klyxum flaccidum</i> , <sup>11</sup>       | klyflaccisteroids G                                             | 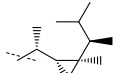   | H              | $\alpha$ -OH   | H              | $\alpha$ -OH   | H              | H              | --             | --             | --              |
| 15 | I    | <i>Sinularia dissecta</i> , <sup>7</sup>      | 1 $\alpha$ ,11 $\alpha$ -<br>dihydroxygorgosterol               |    | $\alpha$ -OH   | $\alpha$ -OH   | H              | H              | H              | H              | --             | --             | --              |
| 16 | I    | <i>Klyxum flaccidum</i> , <sup>11</sup>       | klyflaccisteroids H                                             |    | H              | $\alpha$ -OH   | H              | $\alpha$ -OH   | $\alpha$ -OH   | H              | --             | --             | --              |
| 17 | I    | <i>Klyxum flaccidum</i> , <sup>11</sup>       | klyflaccisteroids I                                             |    | H              | $\alpha$ -OH   | H              | $\alpha$ -OH   | H              | H              | --             | --             | --              |
| 18 | I    | <i>Plexaurella grisea</i> , <sup>9</sup>      | 9 $\alpha$ ,11 $\alpha$ ,14 $\alpha$ -<br>trihydroxygorgosterol |    | H              | $\alpha$ -OH   | $\alpha$ -OH   | H              | H              | $\alpha$ -OH   | --             | --             | --              |
| 19 | II   | <i>Sarcophyton ehrenbergi</i> , <sup>12</sup> | ehrensteroid F                                                  |    | $\alpha$ -OH   | H              | H              | H              | H              | H              | H              | $\alpha$ -OH   | $\beta$ -OH     |
| 20 | II   | <i>Sarcophyton ehrenbergi</i> , <sup>12</sup> | lobophysterol D                                                 |  | H              | $\alpha$ -OH   | H              | H              | $\alpha$ -OH   | H              | H              | $\alpha$ -OH   | $\beta$ -OH     |
| #  | Core | Source                                        | Name                                                            | R <sup>1</sup>                                                                       | R <sup>2</sup> | R <sup>3</sup> | R <sup>4</sup> | R <sup>5</sup> | R <sup>6</sup> | R <sup>7</sup> | R <sup>8</sup> | R <sup>9</sup> | R <sup>10</sup> |
| 21 | II   | <i>Sarcophyton ehrenbergi</i> , <sup>12</sup> | sarcoaldestero A                                                |  | H              | $\alpha$ -OH   | H              | H              | H              | H              | H              | $\alpha$ -OH   | $\beta$ -OH     |

|    |     |                                            |                                                           |                                                                                    |              |              |    |    |    |    |    |    |    |
|----|-----|--------------------------------------------|-----------------------------------------------------------|------------------------------------------------------------------------------------|--------------|--------------|----|----|----|----|----|----|----|
| 22 | I   | <i>Simularia dissecta</i> , <sup>7</sup>   | 1 $\alpha$ ,11 $\alpha$ -dihydroxy-23-demethylgorgosterol | 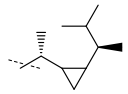 | $\alpha$ -OH | $\alpha$ -OH | H  | H  | H  | H  | -- | -- | -- |
| 23 | III | <i>Simularia dissecta</i> , <sup>13</sup>  | dissesterol                                               |  | --           | --           | -- | -- | -- | -- | -- | -- | -- |
| 24 | I   | <i>Sarcophyton glaucum</i> , <sup>14</sup> | glaucasterol                                              |  | H            | H            | H  | H  | H  | H  | -- | -- | -- |
| 25 | I   | <i>Sarcophyton glaucum</i> , <sup>8</sup>  | 22-dehydrocodisterol                                      |  | H            | H            | H  | H  | H  | H  | -- | -- | -- |
| 26 | I   | <i>Sarcophyton glaucum</i> , <sup>8</sup>  | codisterol                                                |  | H            | H            | H  | H  | H  | H  | -- | -- | -- |

<sup>a</sup> Steroidal compound recovered here in the current work from the crude extract of soft coral, the crude extract was tested *in vivo* as a hepatoprotective agent.



**Table S1.** Calculated free binding energies ( $\Delta G_B$ , in kcal/mol) of the focused library of 26 steroid derivatives (**1-26**) for GST and HSD.

| Steroid derivatives | $\Delta G_B$ , in kcal/mol |      |
|---------------------|----------------------------|------|
|                     | GST                        | HSD  |
| 1 <sup>a</sup>      | -7.7                       | -7.8 |
| 2 <sup>a</sup>      | -8.4                       | -8.2 |
| 3 <sup>a</sup>      | -8.4                       | -8.8 |
| 4                   | -8.5                       | -8.5 |
| 5                   | -7.0                       | -7.9 |
| 6                   | -8.5                       | -8.1 |
| 7                   | -7.5                       | -8.1 |
| 8                   | -8.0                       | -7.8 |
| 9                   | -7.2                       | -8.2 |
| 10                  | -8.9                       | -8.7 |
| 11                  | -8.8                       | -8.6 |
| 12                  | -8.9                       | -9.1 |
| 13                  | -9.1                       | -9.0 |
| 14                  | -9.3                       | -9.4 |
| 15                  | -8.9                       | -8.1 |
| 16                  | -8.4                       | -9.0 |
| 17                  | -9.3                       | -8.7 |
| 18                  | -8.9                       | -8.8 |
| 19                  | -8.8                       | -7.9 |
| 20                  | -8.3                       | -7.9 |
| 21                  | -8.6                       | -9.1 |
| 22                  | -8.6                       | -8.5 |
| 23                  | -8.6                       | -8.4 |
| 24                  | -9.1                       | -9.1 |
| 25                  | -8.7                       | -8.8 |
| 26                  | -8.0                       | -8.3 |

<sup>a</sup>The steroid derivatives recovered experimentally in current work.

## References

- 1 M. P. Rahelivao, T. Lübken, M. Gruner, O. Kataeva, R. Ralambondrahety, H. Andriamanantoanina, M. P. Checinski, I. Bauer and H. J. Knölker, *Org Biomol Chem*, 2017, **15**, 2593–2608.
- 2 M. E. F. Hegazy, T. A. Mohamed, A. I. Elshamy, A. A. Hassanien, N. S. Abdel-Azim, M. A. Shreadah, I. I. Abdelgawad, E. M. Elkady and P. W. Paré, *Nat Prod Res*, 2016, **30**, 340–344.
- 3 B. C. Sekula and W. R. Nes, *Phytochemistry*, 1980, **19**, 1509–1512.
- 4 M. A. Tammam, L. Rárová, M. Kvasnicová, G. Gonzalez, A. M. Emam, A. Mahdy, M. Strnad, E. Ioannou and V. Roussis, *Mar Drugs* 2020, **18**, 632.
- 5 J. H. Su, C. L. Lo, Y. Lu, Z. H. Wen, C. Y. Huang, C. F. Dai and J. H. Sheu, *Bull Chem Soc Jpn*, 2008, **81**, 1616–1620.
- 6 M. Kobayashi, F. Kanda, C. V. Lakshmana Rao, S. M. Dileep Kumar, G. Trimurtulu and C. B. Rao, *Chem Pharm Bull (Tokyo)*, 1990, **38**, 1724–1726.
- 7 B. M. Jagodzinska, J. S. Trimmer, W. Fenical and C. Djerassi, *Journal of Organic Chemistry*, 1985, **50**, 1435–1439.
- 8 M. Kobayashi, T. Ishizaka and H. Mitsuhashi, *Steroids*, 1982, **40**, 209–221.
- 9 A. Rueda, E. Zubía, M. J. Ortega and J. Salvá, *Steroids*, 2001, **66**, 897–904.
- 10 M. Qin, X. Li and B. Wang, *Chin J Chem*, 2012, **30**, 1278–1282.
- 11 W. R. Tseng, C. Y. Huang, Y. Y. Tsai, Y. S. Lin, T. L. Hwang, J. H. Su, P. J. Sung, C. F. Dai and J. H. Sheu, *Bioorg Med Chem Lett*, 2016, **26**, 3253–3257.
- 12 N. T. Ngoc, T. T. H. Hanh, T. H. Quang, N. X. Cuong, N. H. Nam, D. T. Thao, D. C. Thung, P. Van Kiem and C. Van Minh, *Steroids*, 2021, **176**, 108932.
- 13 N. P. Thao, N. H. Nam, N. X. Cuong, B. H. Tai, T. H. Quang, N. T. T. Ngan, B. T. T. Luyen, S. Y. Yang, C. H. Choi, S. Kim, D. Chae, Y. S. Koh, P. Van Kiem, C. Van Minh and Y. H. Kim, *Bull Korean Chem Soc*, 2013, **34**, 949–952.
- 14 M. Kobayashi and H. Mitsuhashi, *Steroids*, 1982, **40**, 665–672.
